# Supplementary material for: Decoding the enigma of RNA–protein recognition: quantum chemical insights into arginine fork motifs
Source: Royal Society of Chemistry journal article supplement (doi:10.1039/d4cp03987d), 2024-01-01
Supplement: d4cp03987d1.pdf [file d4cp03987d1.pdf]

**Electronic Supplementary Information**

**To**

**Decoding the Enigma of RNA-Protein Recognition: Quantum Chemical Insights into Arg-fork Motifs**

Raman Jangra<sup>1</sup>, Teagan Kukhta<sup>2</sup>, John F. Trant<sup>2,3,\*</sup> and Purshotam Sharma<sup>1,2,\*</sup>

<sup>1</sup>*Computational Biochemistry Laboratory, Department of Chemistry and Centre for Advanced Studies in Chemistry, Panjab University, Chandigarh, 160014, India.*

<sup>2</sup>*Department of Chemistry and Biochemistry, University of Windsor, 401 Sunset Ave. Windsor, ON, N9B 3P4, Canada*

<sup>3</sup>*We-Spark Health Institute, 401 Sunset Ave. Windsor ON, N9B 3P4, Canada*

<sup>4</sup>*Binary Star Research Services, LaSalle, ON, N9J 3X8, Canada*

*\*Email: psharma@pu.ac.in, j.trant@uwindsor.ca*

## Table of Contents

|                                                                                                                       |       |
|-----------------------------------------------------------------------------------------------------------------------|-------|
| <b>Section S1. Choice of DFT functional</b> .....                                                                     | SI-3  |
| <b>Supplementary Figures and Tables</b> .....                                                                         | SI-4  |
| <b>Figure S1.</b> Structures and atomic nomenclature of Arg and ribonucleotides.....                                  | SI-5  |
| <b>Figure S2.</b> Crystal structures of Arg forks superposed on optimized reduced models.....                         | SI-6  |
| <b>Figure S3.</b> RDG plots of optimized Type P Arg fork models.....                                                  | SI-7  |
| <b>Figure S4.</b> RDG plots of optimized Type H $\eta$ P Arg fork models.....                                         | SI-8  |
| <b>Figure S5.</b> RDG plots of optimized Type H $\eta$ P Arg fork models.....                                         | SI-9  |
| <b>Figure S6.</b> RDG plots of optimized Type HS Arg fork models.....                                                 | SI-10 |
| <b>Table S1.</b> Distinct representatives of Type P Arg forks.....                                                    | SI-11 |
| <b>Table S2.</b> Distinct representatives of Type H $\eta$ P Arg forks.....                                           | SI-12 |
| <b>Table S3.</b> Distinct representatives of Type H $\eta$ P Arg-forks.....                                           | SI-13 |
| <b>Table S4.</b> Distinct representatives of Type HS Arg-forks.....                                                   | SI-14 |
| <b>Table S5.</b> RMSD values of crystal structure occurrence of Arg forks superposed on optimized reduced models..... | S-15  |
| <b>Table S6.</b> Interaction energies and RMSD values of Type P Arg-fork.....                                         | SI-16 |
| <b>Table S7.</b> Interaction energies and RMSD values of Type HenP Arg-fork.....                                      | SI-17 |
| <b>Table S8.</b> Interaction energies and RMSD values of Type H $\eta$ P Arg-fork.....                                | SI-18 |
| <b>Table S9.</b> Interaction energies and RMSD values of Type HS Arg-fork.....                                        | SI-19 |
| <b>Table S10.</b> Interaction energies calculated using different basis sets.....                                     | SI-20 |
| <b>Table S11.</b> Average interaction energies of Arg-forks with their occurrences.....                               | SI-21 |
| <b>References</b> .....                                                                                               | SI-22 |

**S1. Choice of DFT functional.** For evaluating the choice of DFT functionals, the models were built by methyl-capping the Arg and the interacting terminal ribonucleotides involved in Arg forks, where only interacting portions of ribonucleotide were retained. Specifically, the interacting guanidinium group of arginine was retained, which was capped at *N $\epsilon$*  by replacing the delta ( $\delta$ ) carbon with a methyl group. The interacting phosphate was capped at both *O3'* and *O5'* by replacing *C3'* and *C5'* with methyl groups. However, whenever participating in an interaction with the Arg fork, the sugar moiety was kept along with its respective nucleobase; in these cases, the associated ribonucleoside was methyl capped at both the *O3'* and *O5'* positions. If the phosphate moiety is involved in Arg fork formation along with the sugar moiety, the sugar moiety was methyl capped only at *O3'* and the phosphate was capped by replacing the *C3'* of the ribonucleotide 5' to the phosphate, with a methyl group. Furthermore, when only the nucleobase moiety of the ribonucleotide interacts with Arg, either through hydrogen bonding (in the case of guanine) or through cation- $\pi$  interaction, the associated sugar-phosphate group was removed, and the nucleobase was capped at the glycosidic nitrogen (*N9* for purines and *N1* for pyrimidines), by replacing the *C1'* with a methyl group. In the cases where the phosphate moiety of the interacting nucleobase is also involved in Arg fork formation, the entire ribonucleotide was retained in the computational model, and the ribonucleotide was methyl capped at both its *O3'* and the phosphate oxygen (*i.e.*, *O3'* of the ribonucleotide 5' to the phosphate). Missing hydrogen atoms in the PDB were added to the heavy atoms to fulfill the requisite covalent bonding requirements. Finally, the total charge on the Arg fork was calculated according to the number of phosphate groups ( $-2$  for each) and the guanidinium moiety of Arg ( $+1$ ). These models are smaller than the original motifs and truncated at many positions and were built to examine the efficiency of different density functional theory (DFT) functionals to optimize Arg forks.

For benchmarking, three functionals – the Minnesota functional (M06-2X);<sup>1</sup> Becke's three-parameter hybrid Functional (B3LYP) with the D3 version of Grimme's dispersion incorporating the Becke-Johnson damping function (GD3BJ);<sup>2-5</sup> and the long-range corrected functional ( $\omega$ -B97XD) which includes Grimme's D2 dispersion<sup>6, 7</sup> were employed with the 6-31G(d,p) basis set in Gaussian 16.<sup>8</sup> Also, to consider the effect of bulk solvent (water) on the geometries and energetics of these models, the integral equation formalism variant of the Polarizable Continuum Model (IEFPCM) was used.<sup>9</sup>

## **Supplementary Figures and Tables**

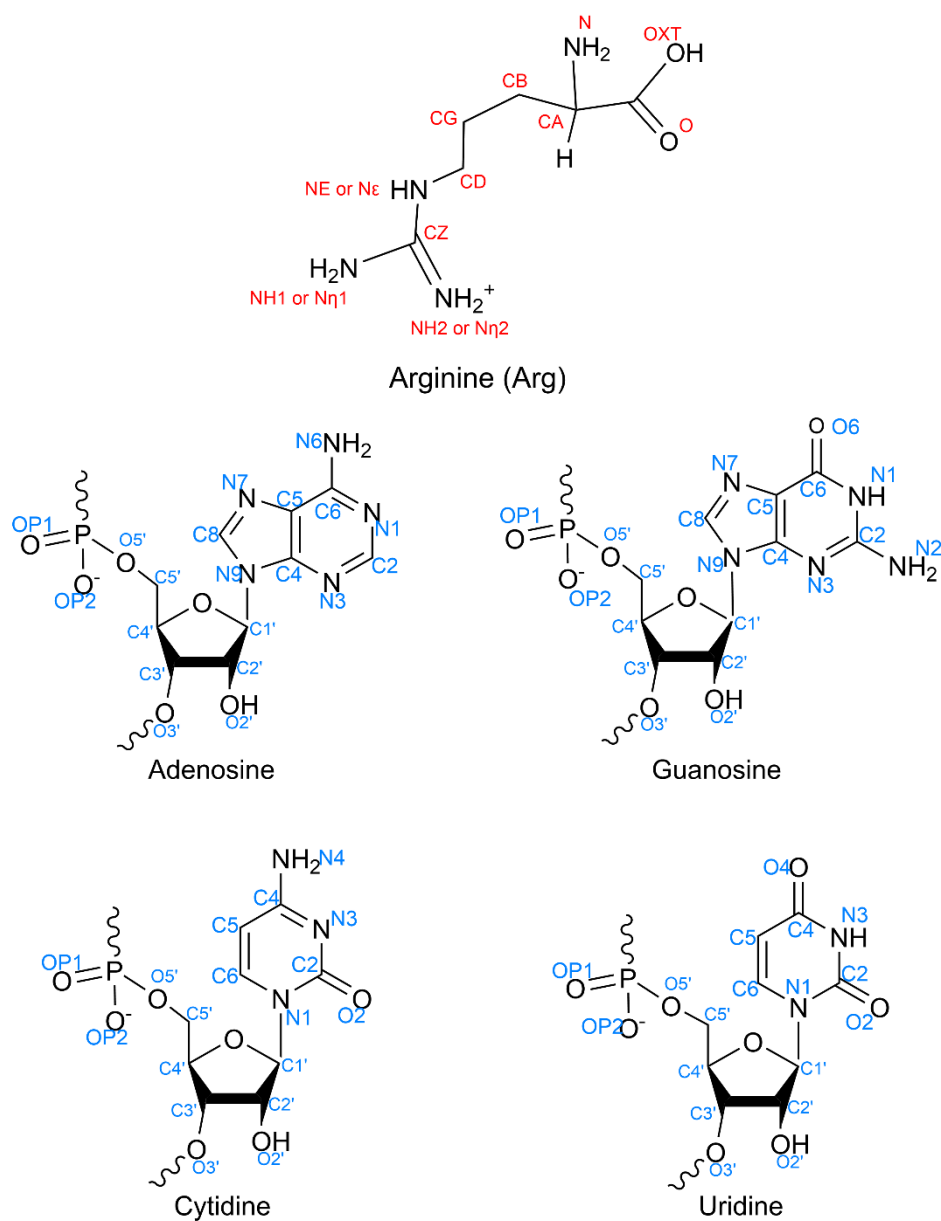

**Figure S1.** Structures and PDB atomic nomenclature of arginine and the ribonucleotides. Wavy lines in ribonucleotides represent the position of attachment of the next ribonucleotide in the RNA chain.

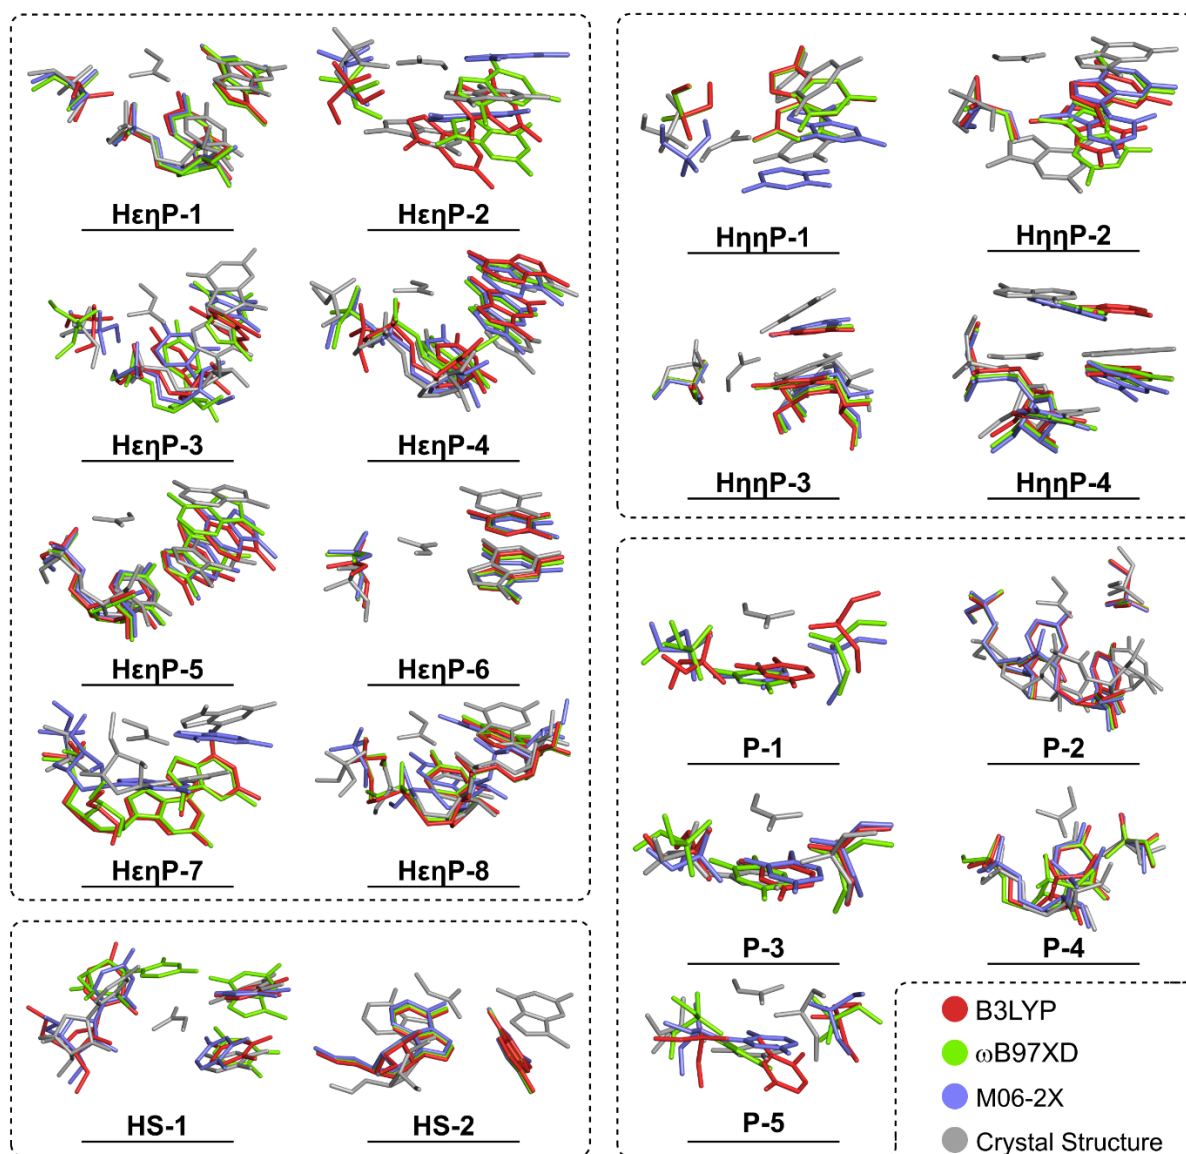

**Figure S2.** Superposition of the QM optimized reduced models of Arg forks on their corresponding crystallographic occurrences using PyMOL. The crystal structure occurrence of the Arg fork is shown by grey sticks, while the optimized Arg fork models using B3LYP,  $\omega$ B97XD, and M06-2X methods are represented by red, green, and blue sticks respectively.

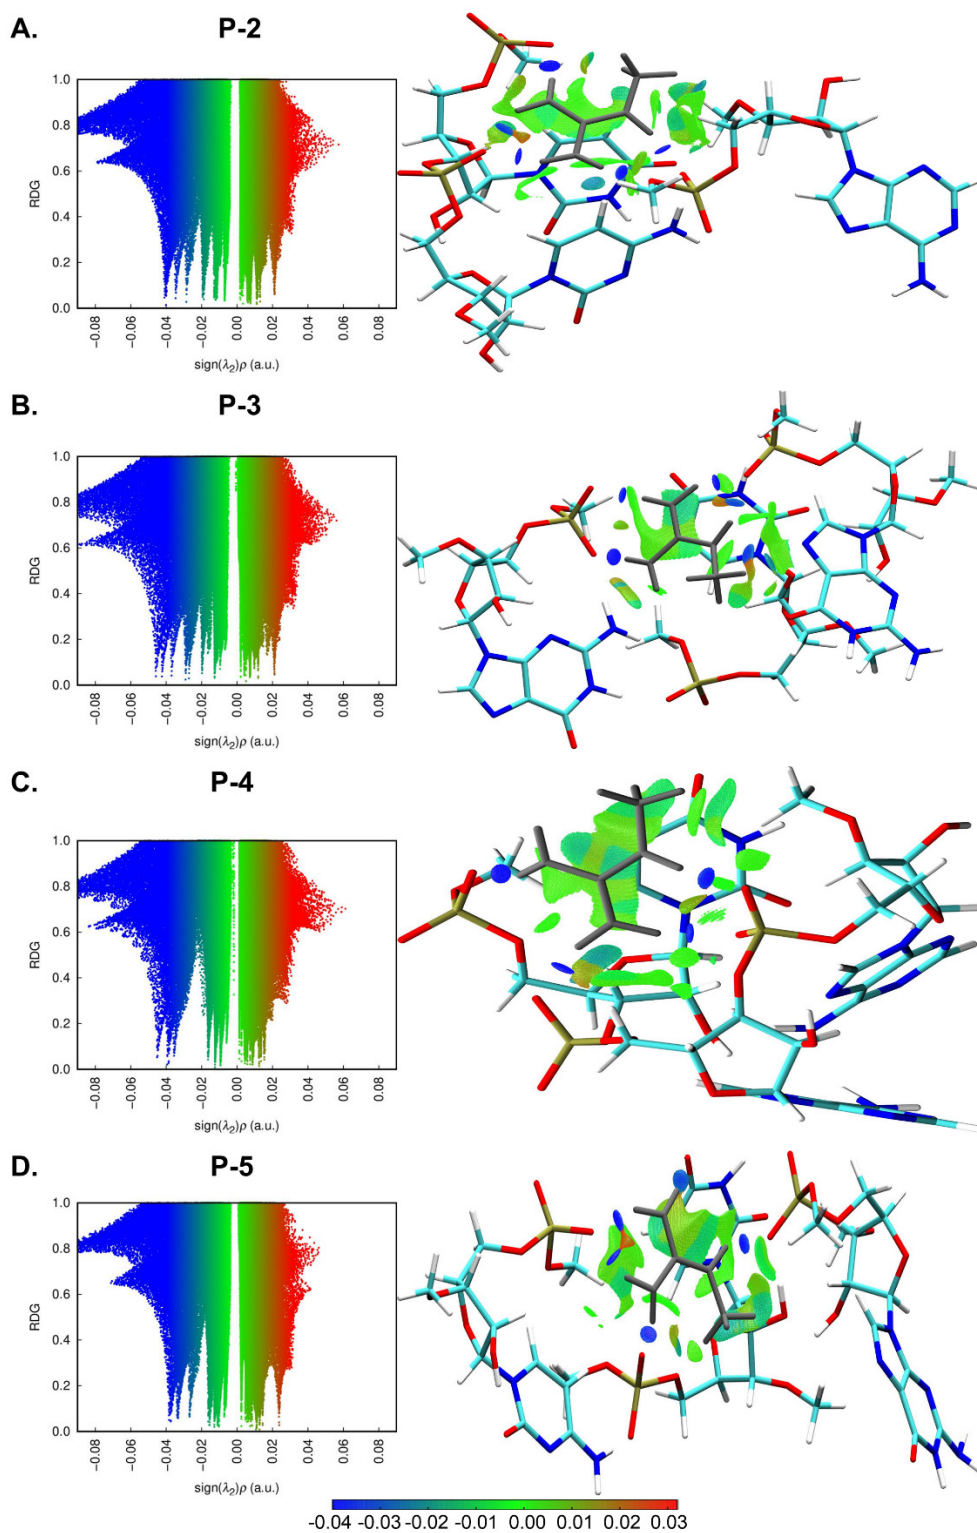

**Figure S3.** NCI analysis of the  $\omega$ -B97XD optimized Type P Arg fork models. RDG scatter plots and isosurface plots, colored based on the values of  $\text{sign}(\lambda_2)\rho$ , are shown on the left and right, respectively, along with a color scale of  $\text{sign}(\lambda_2)\rho$  at the bottom.

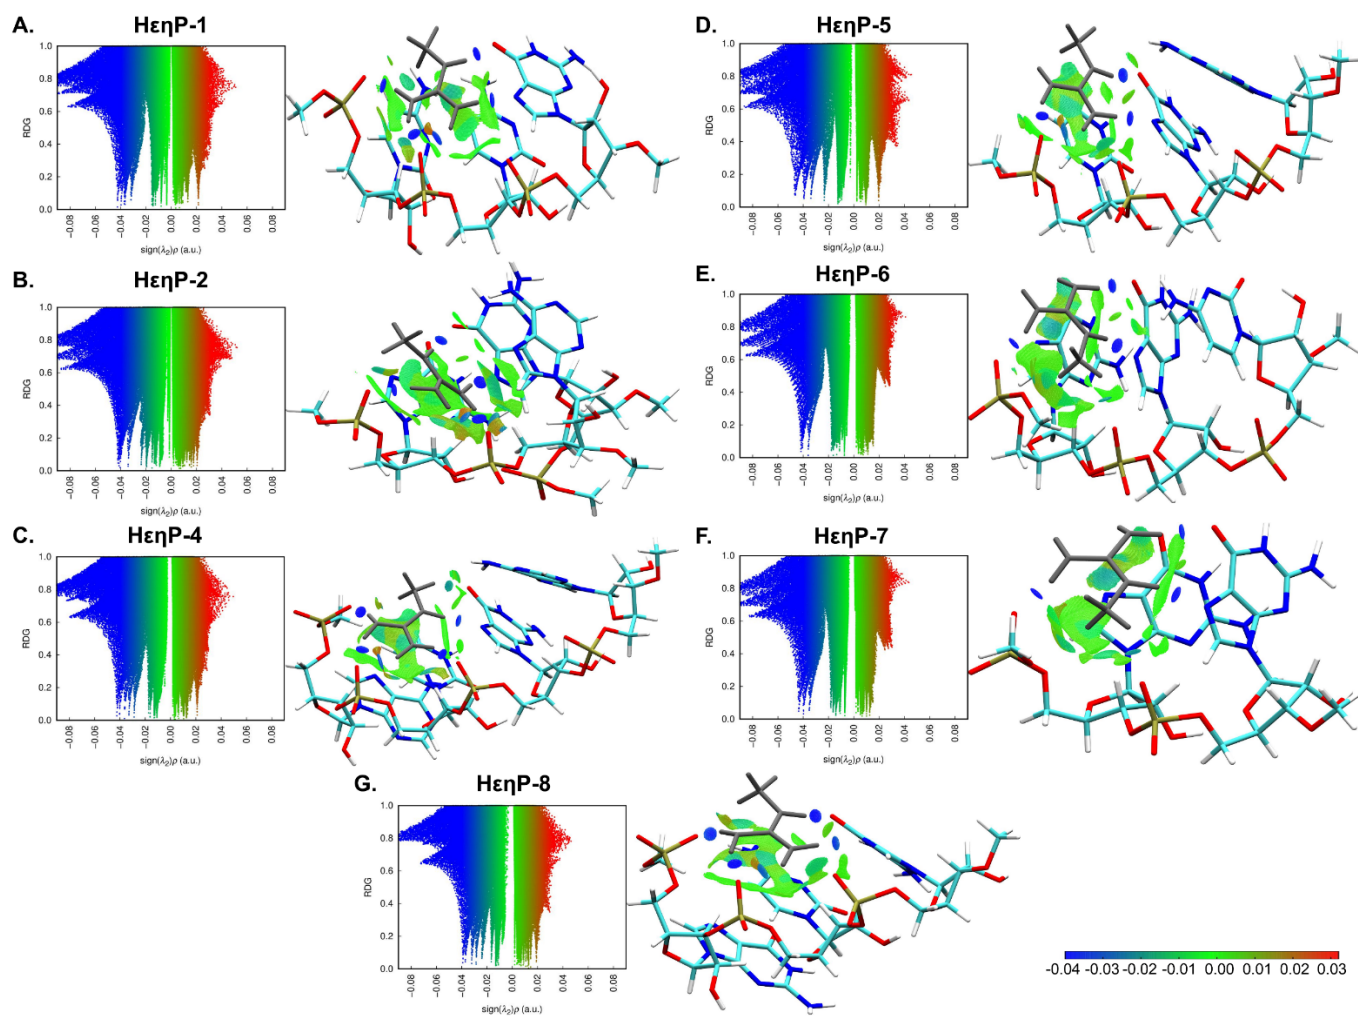

**Figure S4.** NCI analysis of the  $\omega$ -B97XD optimized Type H $\epsilon\eta$ P Arg fork models. RDG scatter plots and isosurface plots, colored based on the values of  $\text{sign}(\lambda_2)\rho$ , are shown on the left and right, respectively, along with a color scale of  $\text{sign}(\lambda_2)\rho$  at the bottom.



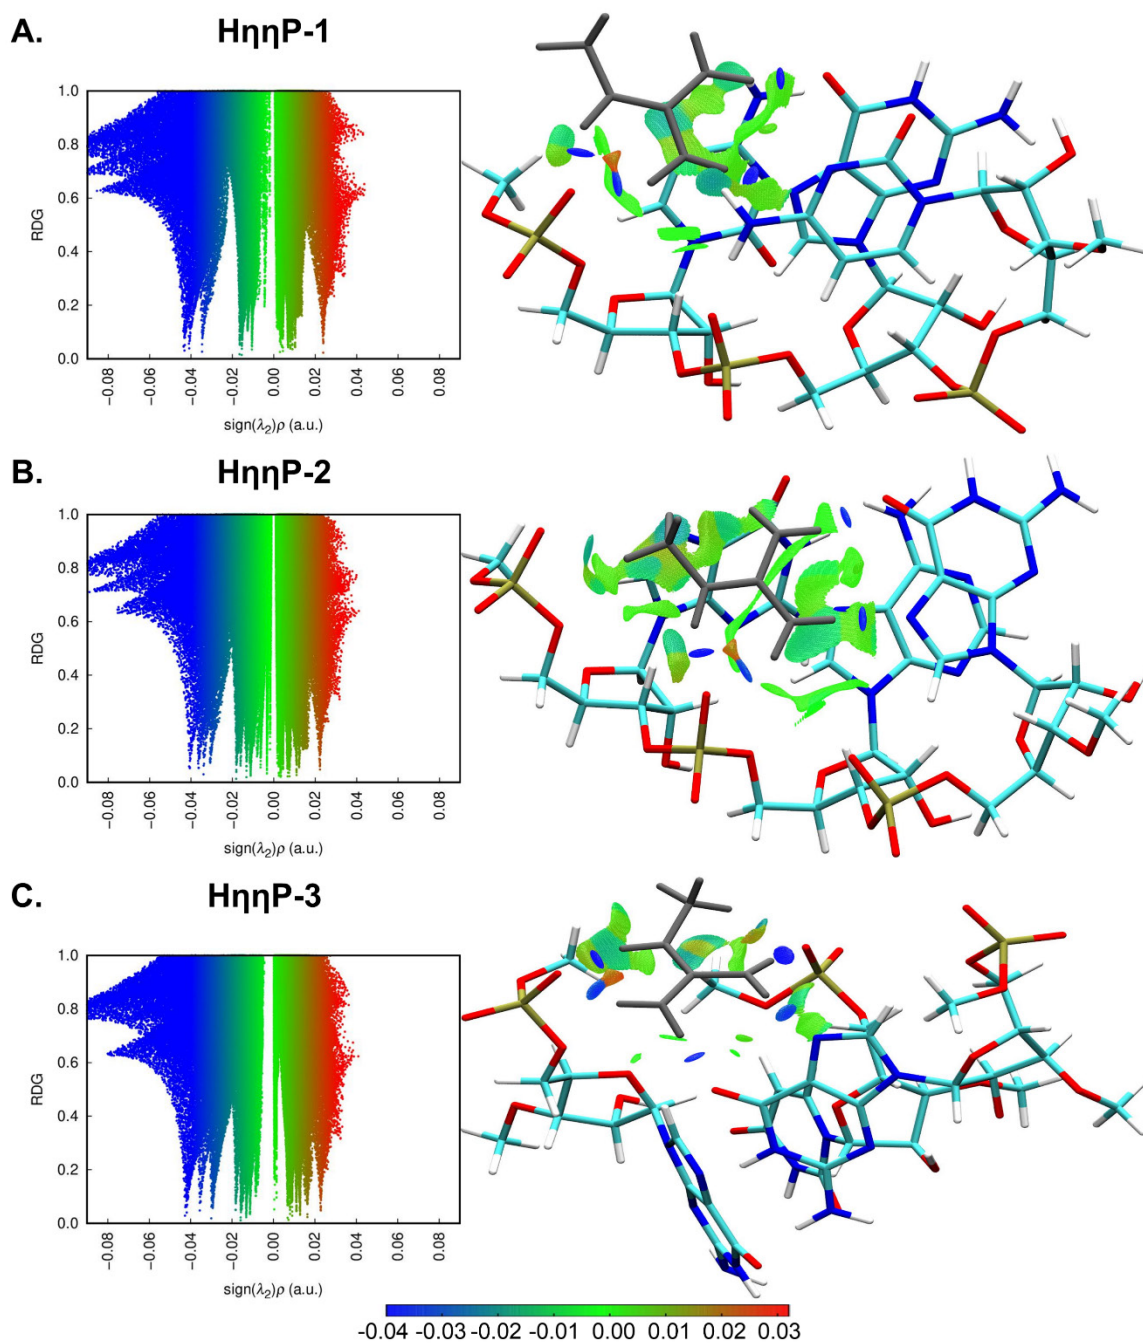

**Figure S5.** NCI analysis of the  $\omega$ -B97XD optimized Type H $\eta$ P Arg fork models. RDG scatter plots and isosurface plots, colored based on the values of  $\text{sign}(\lambda_2)\rho$ , are shown on the left and right, respectively, along with a color scale of  $\text{sign}(\lambda_2)\rho$  at the bottom.

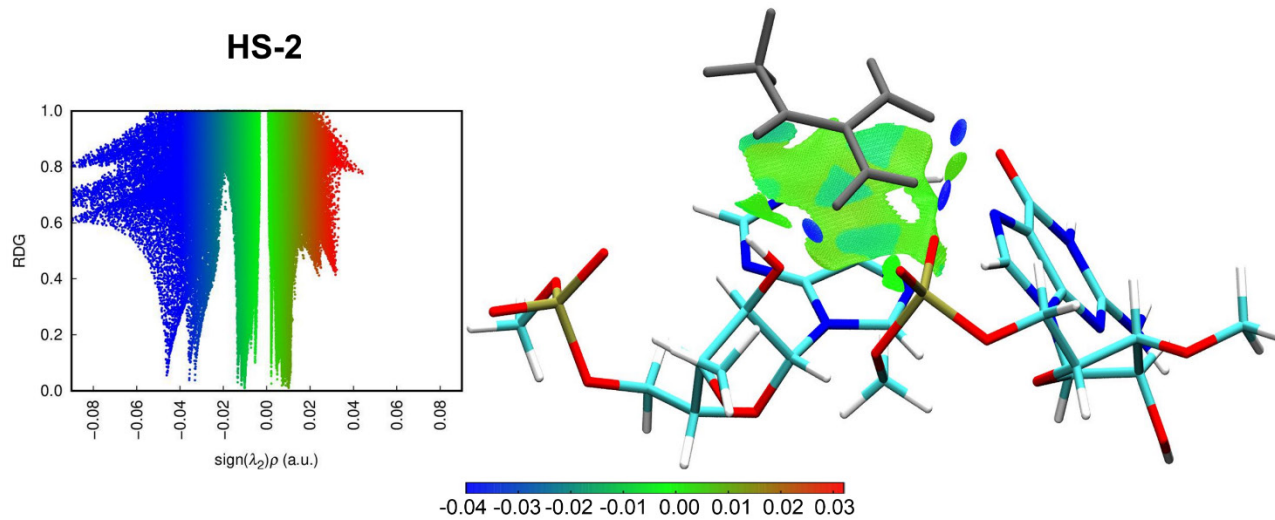

**Figure S6.** NCI analysis of the  $\omega$ -B97XD optimized Type HS Arg fork models. RDG scatter plots and isosurface plots, colored based on the values of  $\text{sign}(\lambda_2)\rho$ , are shown on the left and right, respectively, along with a color scale of  $\text{sign}(\lambda_2)\rho$  at the bottom.

**Table S1.** Characteristics of distinct representatives of Type P Arg forks taken from Chavali *et al.* for this study.<sup>10</sup>

| <b>Nomenclature of the Arg fork</b> | <b>PDB Code</b> | <b>Hydrogen-bonding interactions</b>                                                                                                                                                                    | <b>Nucleobase(s) involved in cation-<math>\pi</math> interactions</b> |
|-------------------------------------|-----------------|---------------------------------------------------------------------------------------------------------------------------------------------------------------------------------------------------------|-----------------------------------------------------------------------|
| <b>P-1</b>                          | 1JJ2            | Arg(K)8 [N $\epsilon$ •••OP2] G(O)1354<br>Arg(K)8 [N $\eta$ 1•••OP2] G(O)644<br>Arg(K)8 [N $\eta$ 2•••OP1] G(O)644<br>Arg(K)8 [N $\eta$ 2•••OP2] G(O)1354                                               | U904                                                                  |
| <b>P-2</b>                          | 1JJ2            | Arg(O)61 [N $\epsilon$ •••OP1] A(0)2739<br>Arg(O)61 [N $\eta$ 1•••OP2] U(0)2736<br>Arg(O)61 [N $\eta$ 1•••OP2] C(0)2737<br>Arg(O)61 [N $\eta$ 2•••OP2] C(0)2737<br>Arg(O)61 [N $\eta$ 2•••OP1] A(0)2739 | U2736, C2737                                                          |
| <b>P-3</b>                          | 1K8A            | Arg(M)8 [N $\epsilon$ •••OP2] G(A)1354<br>Arg(M)8 [N $\eta$ 1•••OP2] G(A)644<br>Arg(M)8 [N $\eta$ 2•••OP1] G(A)644                                                                                      | U904                                                                  |
| <b>P-4</b>                          | 5AOX            | Arg(B)59 [N $\epsilon$ •••OP1] A(C)28<br>Arg(B)59 [N $\eta$ 1•••OP2] U(C)26<br>Arg(B)59 [N $\eta$ 2•••OP2] A(C)27<br>Arg(B)59 [N $\eta$ 2•••OP2] A(C)28                                                 | U26                                                                   |
| <b>P-5</b>                          | 5DM6            | Arg(I)21 [N $\epsilon$ •••OP1] G(X)1250<br>Arg(I)21 [N $\eta$ 1•••OP1] C(X)587<br>Arg(I)21 [N $\eta$ 2•••OP1] C(X)587                                                                                   | U811                                                                  |

**Table S2.** Characteristics of distinct representatives of Type H $\epsilon$  $\eta$ P Arg forks taken from Chavali *et al.* for this study.<sup>10</sup>

| <b>Nomenclature of Arg fork</b>                   | <b>PDB Code</b> | <b>Hydrogen-bonding interactions</b>                                                                                                                                                                  | <b>Nucleobase(s) involved in cation-<math>\pi</math> interactions</b> |
|---------------------------------------------------|-----------------|-------------------------------------------------------------------------------------------------------------------------------------------------------------------------------------------------------|-----------------------------------------------------------------------|
| <b>H<math>\epsilon</math><math>\eta</math>P-1</b> | 1JJ2            | Arg(C)182 [N $\epsilon$ •••O6] G(0)452<br>Arg(C)182 [N $\eta$ 1•••OP1] C(0)450<br>Arg(C)182 [N $\eta$ 1•••OP2] C(0)451<br>Arg(C)182 [N $\eta$ 2•••OP2] C(0)451<br>Arg(C)182 [N $\eta$ 2•••N7] G(0)452 | C451                                                                  |
| <b>H<math>\epsilon</math><math>\eta</math>P-2</b> | 1XOK            | Arg(D)17 [N $\epsilon$ •••O6] G(B)880<br>Arg(D)17 [N $\eta$ 1•••OP2] A(B)878<br>Arg(D)17 [N $\eta$ 2•••N7] G(B)880<br>Arg(D)17 [N $\eta$ 2•••OP2] A(B)878                                             | G877                                                                  |
| <b>H<math>\epsilon</math><math>\eta</math>P-3</b> | 2XLI            | Arg(A)115 [N $\epsilon$ •••O6] G(A)11<br>Arg(A)115 [N $\eta$ 1•••OP2] C(A)9<br>Arg(A)115 [N $\eta$ 1•••OP2] C(A)10<br>Arg(A)115 [N $\eta$ 2•••OP2] C(A)10<br>Arg(A)115 [N $\eta$ 2•••N7] G(A)11       | C10                                                                   |
| <b>H<math>\epsilon</math><math>\eta</math>P-4</b> | 3NMU            | Arg(B)334 [N $\epsilon$ •••O6] G(E)31<br>Arg(B)334 [N $\eta$ 1•••OP2] A(E)29<br>Arg(B)334 [N $\eta$ 1•••OP2] U(E)30<br>Arg(B)334 [N $\eta$ 2•••N7] G(E)31                                             | U30, A32                                                              |
| <b>H<math>\epsilon</math><math>\eta</math>P-5</b> | 3NVI            | Arg(A)334 [N $\epsilon$ •••O6] G(E)22<br>Arg(A)334 [N $\eta$ 1•••OP2] U(E)21<br>Arg(A)334 [N $\eta$ 2•••OP2] U(E)21<br>Arg(A)334 [N $\eta$ 2•••N7] G(E)22                                             | U21, A23                                                              |
| <b>H<math>\epsilon</math><math>\eta</math>P-6</b> | 4L8R            | Arg(C)181 [N $\epsilon$ •••N7] G(A)7<br>Arg(C)181 [N $\eta$ 1•••OP1] G(A)6<br>Arg(C)181 [N $\eta$ 2•••O6] G(A)7                                                                                       | C8                                                                    |
| <b>H<math>\epsilon</math><math>\eta</math>P-7</b> | 4TUW            | Arg(A)240 [N $\epsilon$ •••N7] G(C)9<br>Arg(A)240 [N $\eta$ 1•••OP1] G(C)8<br>Arg(A)240 [N $\eta$ 2•••O6] G(C)9                                                                                       | G8                                                                    |
| <b>H<math>\epsilon</math><math>\eta</math>P-8</b> | 5DEA            | Arg(B)10 [N $\epsilon$ •••O6] G(A)31<br>Arg(B)10 [N $\eta$ 1•••OP2] G(A)29<br>Arg(B)10 [N $\eta$ 1•••OP2] C(A)30<br>Arg(B)10 [N $\eta$ 2•••N7] G(A)31<br>Arg(B)10 [N $\eta$ 2•••OP2] G(A)31           | C30                                                                   |

**Table S3.** Characteristics of distinct representatives of Type H $\eta$  $\eta$ P Arg forks taken from Chavali *et al.* for this study.<sup>10</sup>

| <b>Nomenclature of Arg fork</b>               | <b>PDB Code</b> | <b>Hydrogen-bonding interactions</b>                                                                                                                                                        | <b>Nucleobase(s) involved in cation-<math>\pi</math> interactions</b> |
|-----------------------------------------------|-----------------|---------------------------------------------------------------------------------------------------------------------------------------------------------------------------------------------|-----------------------------------------------------------------------|
| <b>H<math>\eta</math><math>\eta</math>P-1</b> | 1C0A            | Arg(A)222 [N $\epsilon$ •••OP2] C(B)672<br>Arg(A)222 [N $\eta$ 1•••O6] G(B)673<br>Arg(A)222 [N $\eta$ 2•••OP2] C(B)672<br>Arg(A)222 [N $\eta$ 2•••N7] G(B)673                               | C674                                                                  |
| <b>H<math>\eta</math><math>\eta</math>P-2</b> | 1IL2            | Arg(A)222 [N $\epsilon$ •••OP2] A(C)972<br>Arg(A)222 [N $\eta$ 1•••O6] G(C)973<br>Arg(A)222 [N $\eta$ 2•••OP2] A(C)972<br>Arg(A)222 [N $\eta$ 2•••N7] G(C)973                               | G971                                                                  |
| <b>H<math>\eta</math><math>\eta</math>P-3</b> | 5UD5            | Arg(A)58 [N $\epsilon$ •••OP2] G(C)21<br>Arg(A)58 [N $\eta$ 1•••N7] G(C)47<br>Arg(A)58 [N $\eta$ 1•••OP1] U(C)59<br>Arg(A)58 [N $\eta$ 2•••OP1] G(C)21<br>Arg(A)58 [N $\eta$ 2•••O6] G(C)47 | U59                                                                   |
| <b>H<math>\eta</math><math>\eta</math>P-4</b> | 6CMN            | Arg(A)47 [N $\epsilon$ •••OP2] U(D)23<br>Arg(A)47 [N $\eta$ 1•••O6] G(D)26<br>Arg(A)47 [N $\eta$ 2•••O5'] U(D)23<br>Arg(A)47 [N $\eta$ 2•••N7] G(D)26                                       | A22, U23                                                              |

**Table S4.** Characteristics of distinct representatives of Type HS Arg forks taken from Chavali *et al.* for this study.<sup>10</sup>

| Nomenclature of the Arg fork | PDB Code | Hydrogen-bonding interactions                                                                                                                     | Nucleobase involved in cation- $\pi$ interactions |
|------------------------------|----------|---------------------------------------------------------------------------------------------------------------------------------------------------|---------------------------------------------------|
| <b>HS-1</b>                  | 1N32     | Arg(G)3 [N $\epsilon$ •••N7] G(A)933<br>Arg(G)3 [N $\eta$ 1•••O2'] U(A)1380<br>Arg(G)3 [N $\eta$ 2•••O6] G(A)933                                  | C932                                              |
| <b>HS-2</b>                  | 5WWF     | Arg(C)99 [N $\epsilon$ •••O2'] A(D)2<br>Arg(C)99 [N $\eta$ 1•••O6] G(D)4<br>Arg(C)99 [N $\eta$ 2•••O2'] A(D)2<br>Arg(C)99 [N $\eta$ 2•••N7] G(D)4 | A2                                                |

**Table S5.** RMSD values obtained during benchmarking of geometries optimized reduced models using three different DFT functionals, with respect to the starting crystal structure geometry.

| Arg fork                                          | RMSD (Å) |       |                |
|---------------------------------------------------|----------|-------|----------------|
|                                                   | B3LYP    | M062X | $\omega$ B97XD |
| <b>P-1</b>                                        | 0.409    | 0.032 | 0.602          |
| <b>P-2</b>                                        | 0.496    | 0.579 | 0.544          |
| <b>P-3</b>                                        | 0.954    | 0.926 | 0.783          |
| <b>P-4</b>                                        | 0.394    | 0.247 | 0.556          |
| <b>P-5</b>                                        | 2.105    | 0.820 | 0.840          |
| <b>H<math>\epsilon</math><math>\eta</math>P-1</b> | 0.453    | 0.436 | 0.413          |
| <b>H<math>\epsilon</math><math>\eta</math>P-2</b> | 1.271    | 0.922 | 1.517          |
| <b>H<math>\epsilon</math><math>\eta</math>P-3</b> | 1.499    | 0.960 | 0.468          |
| <b>H<math>\epsilon</math><math>\eta</math>P-4</b> | 1.043    | 0.991 | 1.069          |
| <b>H<math>\epsilon</math><math>\eta</math>P-5</b> | 0.779    | 0.717 | 0.553          |
| <b>H<math>\epsilon</math><math>\eta</math>P-6</b> | 0.652    | 0.620 | 0.700          |
| <b>H<math>\epsilon</math><math>\eta</math>P-7</b> | 0.810    | 0.788 | 0.817          |
| <b>H<math>\epsilon</math><math>\eta</math>P-8</b> | 0.441    | 0.500 | 0.395          |
| <b>H<math>\eta</math><math>\eta</math>P-1</b>     | 1.088    | 1.184 | 0.943          |
| <b>H<math>\eta</math><math>\eta</math>P-2</b>     | 1.770    | 1.854 | 1.934          |
| <b>H<math>\eta</math><math>\eta</math>P-3</b>     | 0.946    | 0.892 | 0.898          |
| <b>H<math>\eta</math><math>\eta</math>P-4</b>     | 0.586    | 0.619 | 0.752          |
| <b>HS-1</b>                                       | 1.011    | 1.000 | 1.392          |
| <b>HS-2</b>                                       | 1.348    | 1.317 | 1.353          |
| <b>Average</b>                                    | 0.950    | 0.811 | 0.870          |

**Table S6.** Interaction energies calculated at  $\omega$ -B97XD/6-311+G(2df,2p) and RMSD values with respect to the starting crystal structure geometry for the full models of Type P Arg forks.

| <b>Arg fork</b>       | <b>Interaction Energy (kcal mol<sup>-1</sup>)</b> | <b>RMSD (Å)</b> |
|-----------------------|---------------------------------------------------|-----------------|
| <b>P-1</b>            | -41.4                                             | 1.664           |
| <b>P-2</b>            | -40.2                                             | 2.017           |
| <b>P-3</b>            | -38.3                                             | 1.539           |
| <b>P-4</b>            | -36.5                                             | 0.794           |
| <b>P-5</b>            | -36.4                                             | 2.375           |
| <b>Average</b>        | -38.6                                             | 1.678           |
| <b>Std. deviation</b> | 1.9                                               | 0.529           |



**Table S7.** Interaction energies calculated at  $\omega$ -B97XD/6-311+G(2df,2p) and RMSD values with respect to the starting crystal structure geometry for the full models of Type H $\epsilon$  $\eta$ P Arg-forks.

| <b>Arg fork</b>                                   | <b>Interaction Energy (kcal mol<sup>-1</sup>)</b> | <b>RMSD (Å)</b> |
|---------------------------------------------------|---------------------------------------------------|-----------------|
| <b>H<math>\epsilon</math><math>\eta</math>P-1</b> | -40.2                                             | 0.383           |
| <b>H<math>\epsilon</math><math>\eta</math>P-2</b> | -38.8                                             | 0.416           |
| <b>H<math>\epsilon</math><math>\eta</math>P-3</b> | -40.3                                             | 0.393           |
| <b>H<math>\epsilon</math><math>\eta</math>P-4</b> | -41.6                                             | 0.761           |
| <b>H<math>\epsilon</math><math>\eta</math>P-5</b> | -33.5                                             | 1.034           |
| <b>H<math>\epsilon</math><math>\eta</math>P-6</b> | -31.1                                             | 0.891           |
| <b>H<math>\epsilon</math><math>\eta</math>P-7</b> | -29.1                                             | 0.524           |
| <b>H<math>\epsilon</math><math>\eta</math>P-8</b> | -38.2                                             | 0.568           |
| <b>Average</b>                                    | -36.8                                             | 0.739           |
| <b>Std. deviation</b>                             | 4.2                                               | 0.397           |

**Table S8.** Interaction energies calculated at  $\omega$ -B97XD/6-311+G(2df,2p) and RMSD values with respect to the starting crystal structure geometry for the full models of Type H $\eta$  $\eta$ P Arg forks.

| <b>Arg fork</b>                               | <b>Interaction Energy (kcal mol<sup>-1</sup>)</b> | <b>RMSD (Å)</b> |
|-----------------------------------------------|---------------------------------------------------|-----------------|
| <b>H<math>\eta</math><math>\eta</math>P-1</b> | -32.9                                             | 0.244           |
| <b>H<math>\eta</math><math>\eta</math>P-2</b> | -35.5                                             | 0.363           |
| <b>H<math>\eta</math><math>\eta</math>P-3</b> | -36.6                                             | 0.548           |
| <b>H<math>\eta</math><math>\eta</math>P-4</b> | -38.1                                             | 0.578           |
| <b>Average</b>                                | -35.8                                             | 0.433           |
| <b>Std. deviation</b>                         | 1.9                                               | 0.137           |

**Table S9.** Interaction energies calculated at  $\omega$ -B97XD/6-311+G(2df,2p) and RMSD values with respect to the starting crystal structure geometry for the full models of Type HS Arg-forks.

| <b>Arg fork</b>       | <b>Interaction Energy (kcal mol<sup>-1</sup>)</b> | <b>RMSD (Å)</b> |
|-----------------------|---------------------------------------------------|-----------------|
| <b>HS-1</b>           | -32.1                                             | 2.279           |
| <b>HS-2</b>           | -25.1                                             | 1.618           |
| <b>Average</b>        | -28.9                                             | 1.945           |
| <b>Std. deviation</b> | 3.5                                               | 0.331           |

**Table S10.** Comparison of interaction energies for two representatives of each Arg-fork type, calculated using different basis sets, on the full, optimized models.

| <b>Arg-fork<br/>Models</b>                        | <b>Interaction energy (kcal mol<sup>-1</sup>)</b> |                |                    |                |
|---------------------------------------------------|---------------------------------------------------|----------------|--------------------|----------------|
|                                                   | <b>6-311+G(2df,2p)</b>                            | <b>cc-pVDZ</b> | <b>aug-cc-pVDZ</b> | <b>cc-pVTZ</b> |
| <b>HS-1</b>                                       | -32.1                                             | -36.2          | -32.4              | -33.9          |
| <b>HS-2</b>                                       | -25.1                                             | -27.6          | -25.4              | -26.1          |
| <b>H<math>\epsilon</math><math>\eta</math>P-1</b> | -40.2                                             | -45.9          | -40.6              | -42.6          |
| <b>H<math>\epsilon</math><math>\eta</math>P-2</b> | -38.8                                             | -44.3          | -39.3              | -41.0          |
| <b>P-1</b>                                        | -41.4                                             | -46.7          | -41.9              | -43.6          |
| <b>P-2</b>                                        | -40.2                                             | -45.7          | -40.6              | -42.4          |
| <b>H<math>\eta</math><math>\eta</math>P-1</b>     | -32.9                                             | -36.7          | -33.2              | -34.3          |
| <b>H<math>\eta</math><math>\eta</math>P-2</b>     | -35.5                                             | -40.9          | -35.9              | -37.9          |

**Table S11.** Average interaction energies for the full models of all four types of Arg-forks, with occurrences as identified by Chavali *et al.*<sup>10</sup>

| <b>Type of Arg-fork</b> | <b>Average interaction energy (kcal mol<sup>-1</sup>)</b> | <b>Frequency of crystal structure occurrences</b> |
|-------------------------|-----------------------------------------------------------|---------------------------------------------------|
| <b>P</b>                | -38.6                                                     | 60                                                |
| <b>HεηP</b>             | -36.8                                                     | 43                                                |
| <b>HηηP</b>             | -35.8                                                     | 7                                                 |
| <b>HS</b>               | -28.9                                                     | 9                                                 |

## References:

1. Y. Zhao and D. G. Truhlar, *Theor. Chem. Acc.*, 2008, **120**, 215-241.
2. A. D. Becke, *The Journal of Chemical Physics*, 1993, **98**, 5648-5652.
3. C. Lee, W. Yang and R. G. Parr, *Physical Review B*, 1988, **37**, 785-789.
4. B. Miehl, A. Savin, H. Stoll and H. Preuss, *Chem. Phys. Lett.*, 1989, **157**, 200-206.
5. S. Grimme, S. Ehrlich and L. Goerigk, *J. Comput. Chem.*, 2011, **32**, 1456-1465.
6. J.-D. Chai and M. Head-Gordon, *Physical Chemistry Chemical Physics*, 2008, **10**, 6615-6620.
7. S. Grimme, *J. Comput. Chem.*, 2006, **27**, 1787-1799.
8. M. J. Frisch, G. W. Trucks, H. B. Schlegel, G. E. Scuseria, M. A. Robb, J. R. Cheeseman, G. Scalmani, V. Barone, G. A. Petersson, H. Nakatsuji, X. Li, M. Caricato, A. V. Marenich, J. Bloino, B. G. Janesko, R. Gomperts, B. Mennucci, H. P. Hratchian, J. V. Ortiz, A. F. Izmaylov, J. L. Sonnenberg, Williams, F. Ding, F. Lipparini, F. Egidi, J. Goings, B. Peng, A. Petrone, T. Henderson, D. Ranasinghe, V. G. Zakrzewski, J. Gao, N. Rega, G. Zheng, W. Liang, M. Hada, M. Ehara, K. Toyota, R. Fukuda, J. Hasegawa, M. Ishida, T. Nakajima, Y. Honda, O. Kitao, H. Nakai, T. Vreven, K. Throssell, J. A. Montgomery Jr., J. E. Peralta, F. Ogliaro, M. J. Bearpark, J. J. Heyd, E. N. Brothers, K. N. Kudin, V. N. Staroverov, T. A. Keith, R. Kobayashi, J. Normand, K. Raghavachari, A. P. Rendell, J. C. Burant, S. S. Iyengar, J. Tomasi, M. Cossi, J. M. Millam, M. Klene, C. Adamo, R. Cammi, J. W. Ochterski, R. L. Martin, K. Morokuma, O. Farkas, J. B. Foresman and D. J. Fox, Wallingford, CT2016.
9. G. Scalmani and M. J. Frisch, *The Journal of chemical physics*, 2010, **132**, 114110.
10. S. S. Chavali, C. E. Cavender, D. H. Mathews and J. E. Wedekind, *Journal of the American Chemical Society*, 2020, **142**, 19835-19839.
